# Supplementary material
Source: MDPI journal article supplement (https://www.mdpi.com/2311-5637/9/1/60)
Supplement: s1 [file s1]

# **Effect of Alkaline and Mechanical Pretreatment of Wheat Straw on Enrichment Cultures from *Pachnoda marginata* Larva Gut**

Bruna Grosch Schroeder<sup>1</sup>, Havva Betül İstanbullu<sup>1</sup>, Matthias Schmidt<sup>2</sup>, Washington Logroño<sup>1</sup>, Hauke Harms<sup>1</sup> and Marcell Nikolausz<sup>1\*</sup>

**Supplementary Figures:**

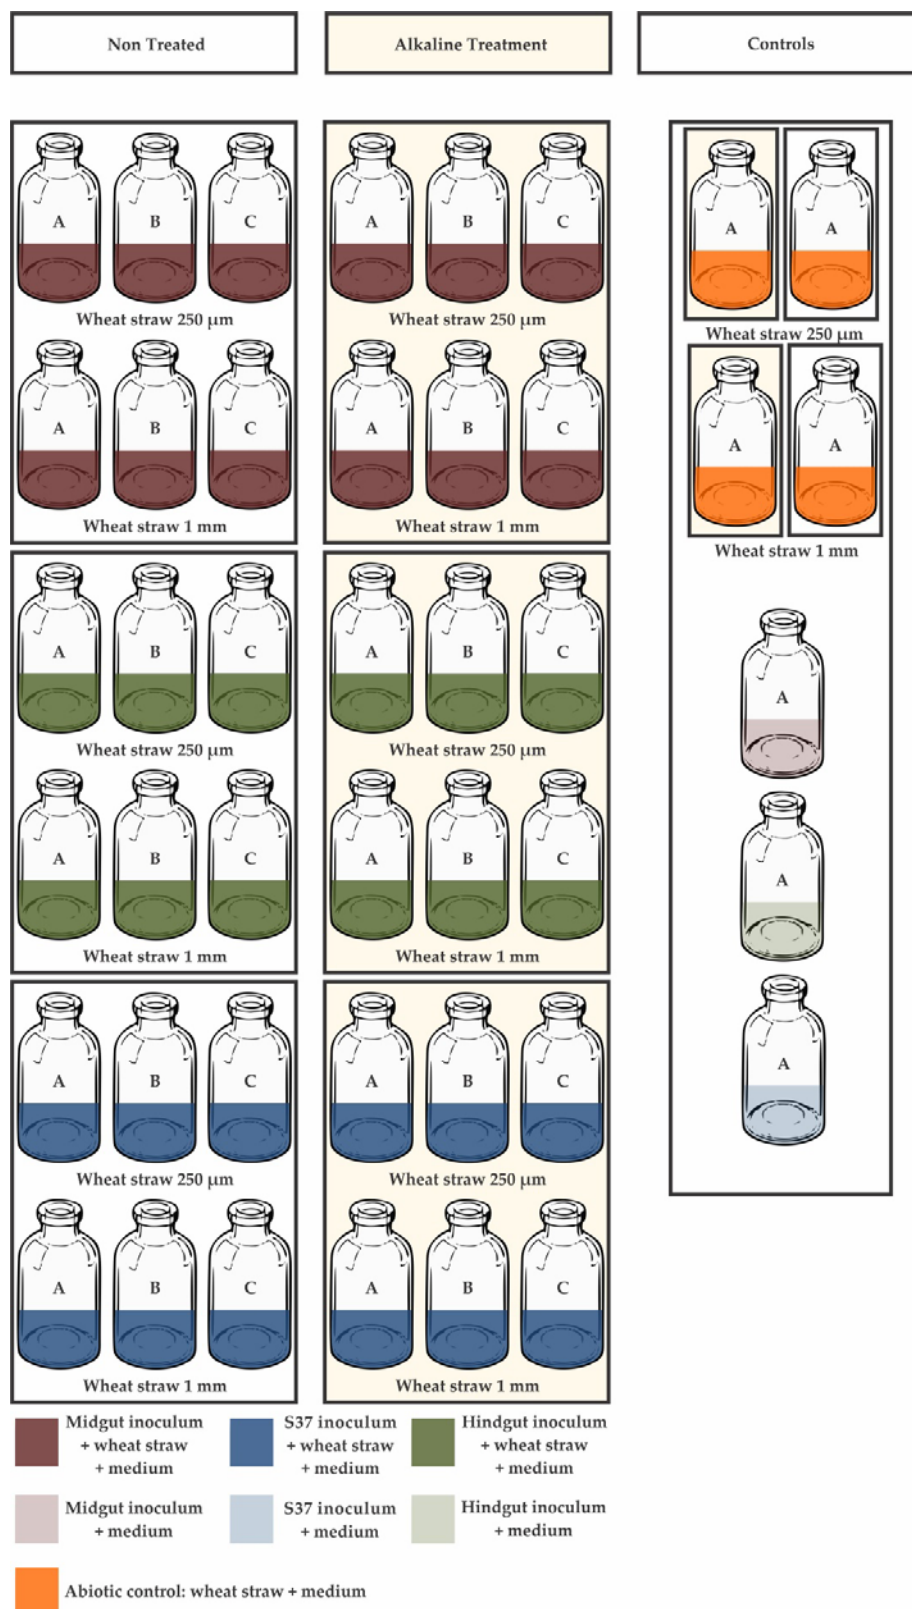

**Figure S1:** Experimental design.

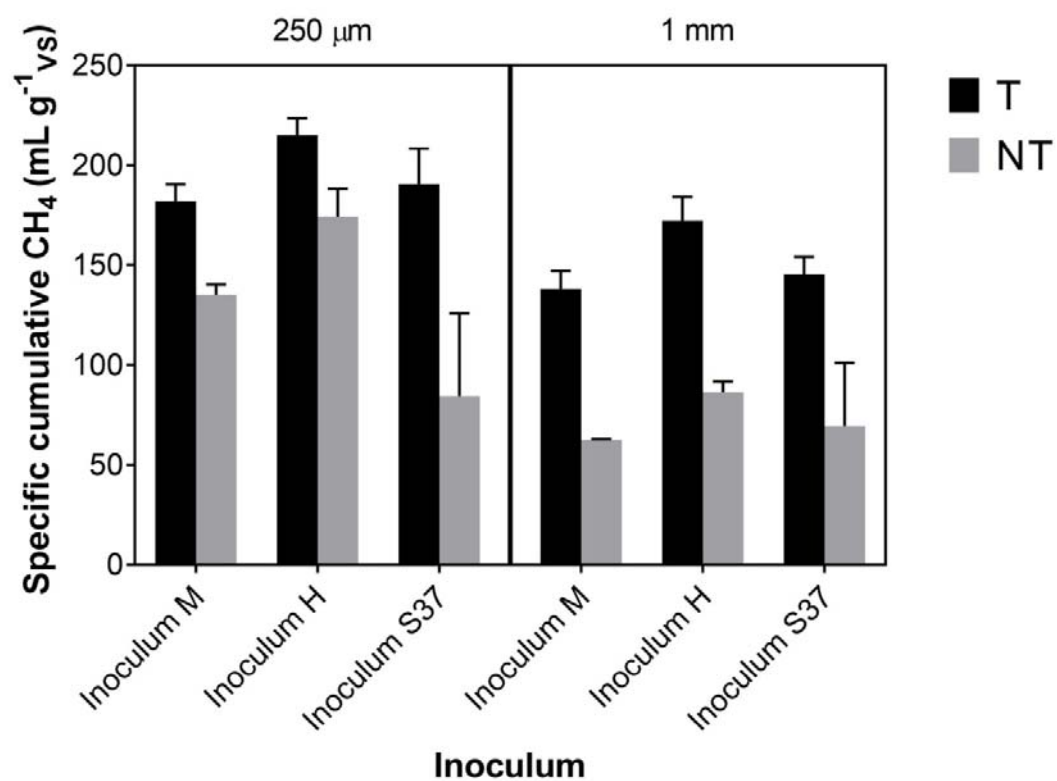

**Figure S2:** Specific cumulative methane at 30 days of cultivation.

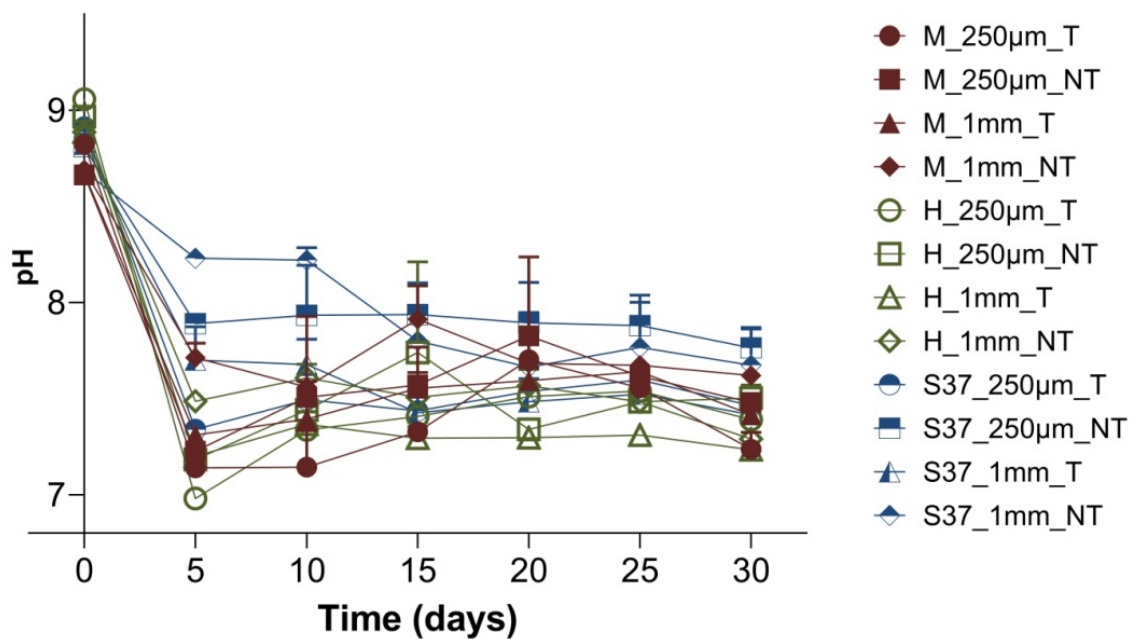

**Figure S3:** pH over 30 days of cultivation in the midgut (**M**), hindgut (**H**) larva cultures and Szarvas soda lake (**S37**) culture. The error bars represent the standard deviation of the mean of  $n = 3$  (invisible error bars are smaller than the symbol).

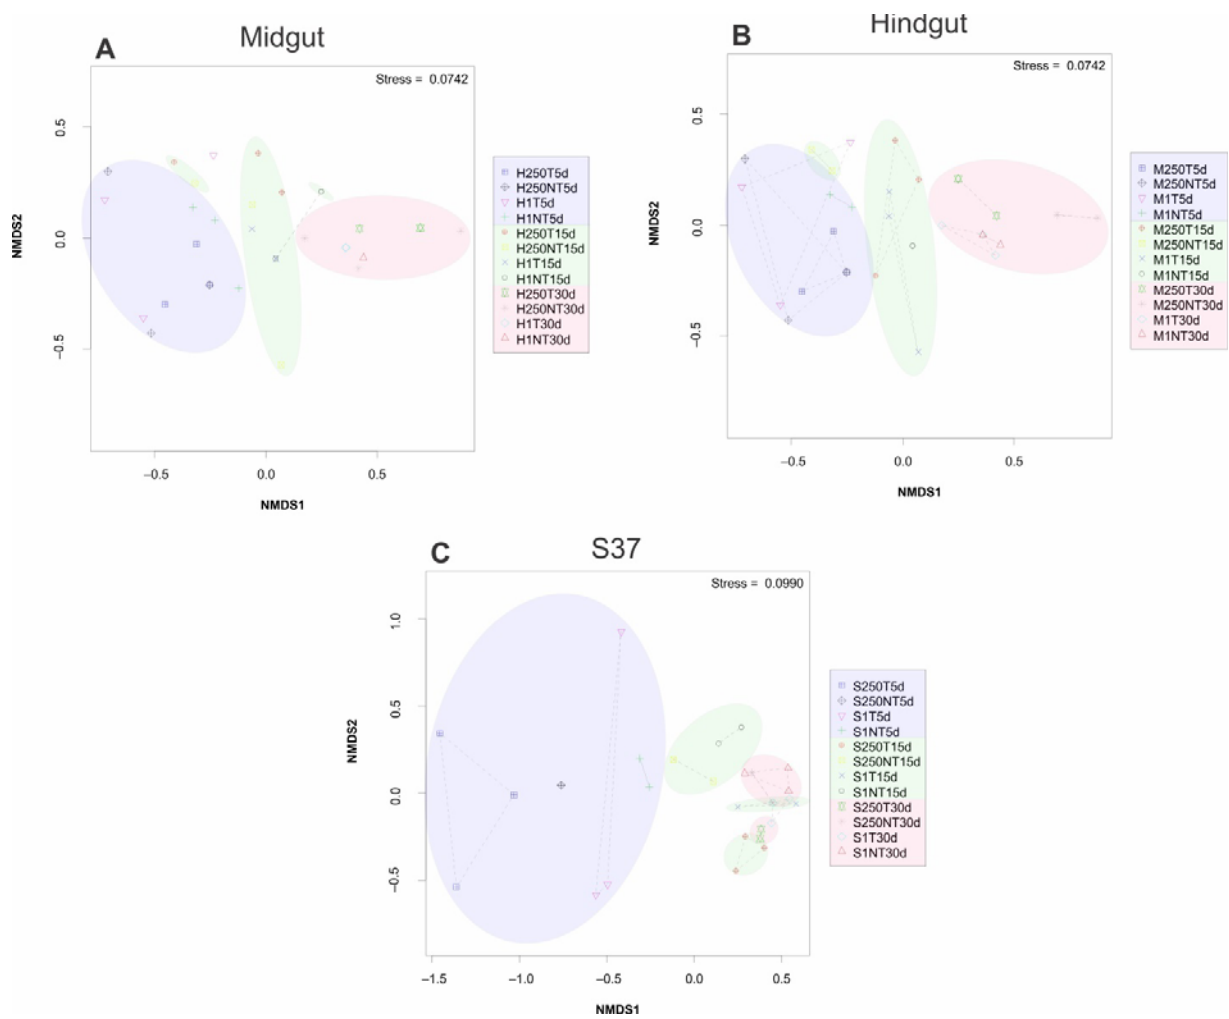

**Figure S4:** Bacterial community dynamics at 5, 15 and 30 days of cultivation. The non-metric multidimensional scaling (NMDS) plot of T-RFLP profiles of bacterial 16S rRNA gene amplicons obtained by *RSa I* restriction enzyme. Plot based on Bray-Curtis dissimilarity index showing the similarity relationships of the (A) midgut cultures, (B) hindgut cultures and (C) Szarvas soda lake cultures.

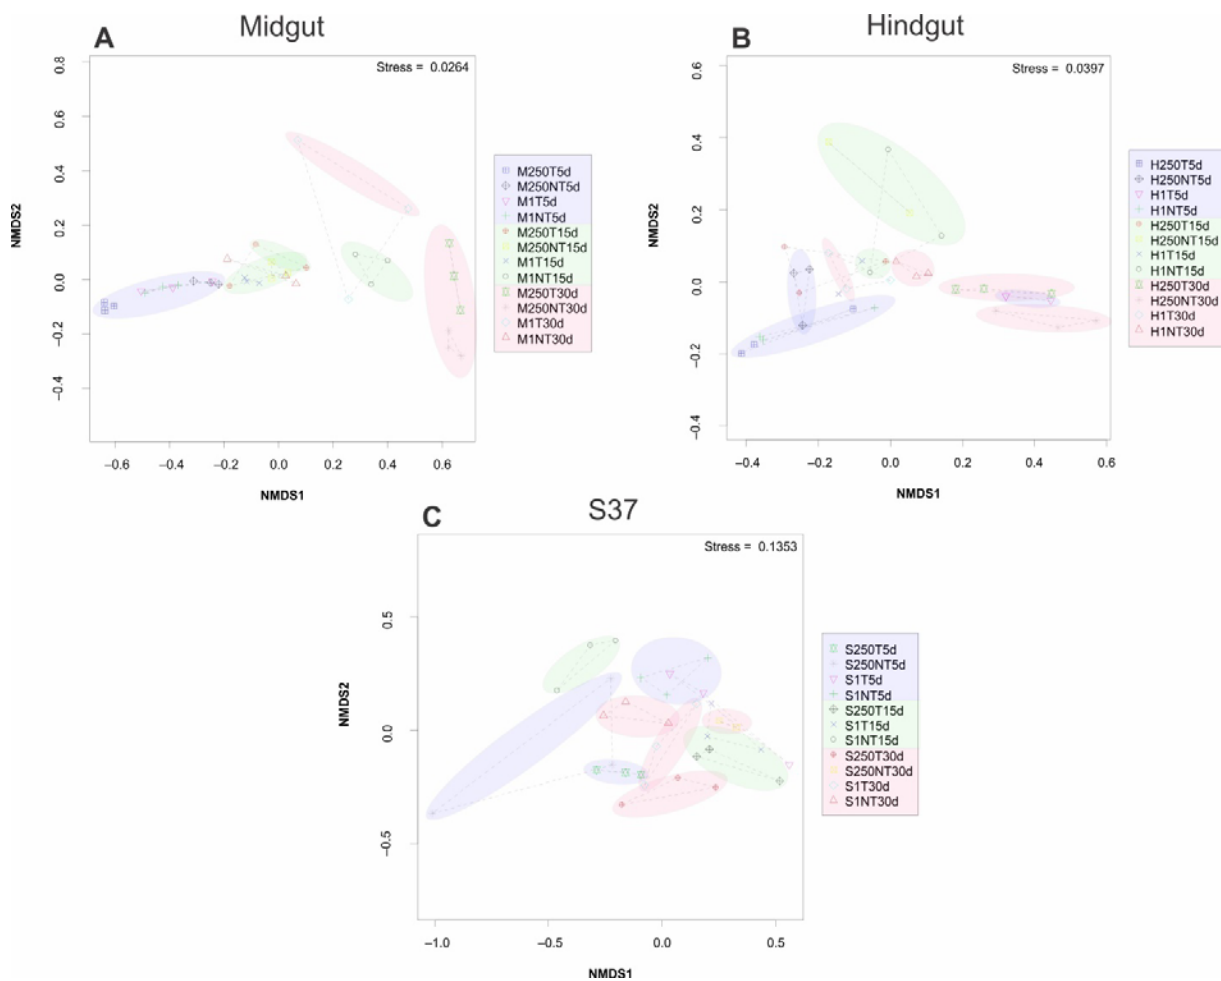

**Figure S5:** Methanogenic community dynamics at 5, 15 and 30 days of cultivation. The non-metric multidimensional scaling (NMDS) plot of the T-RFLP data obtained by *Bst*NI restriction enzyme. Plot based on Bray–Curtis dissimilarity index showing the similarity relationships of the (A) midgut cultures, (B) hindgut cultures and (C) Szarvas soda lake cultures.

**Table S1:** Specific cumulative methane at 30 days of cultivation data.

|              | A           |          |          | B           |          |          | C        |          |          | D        |          |          |
|--------------|-------------|----------|----------|-------------|----------|----------|----------|----------|----------|----------|----------|----------|
|              | 250 $\mu$ m |          |          | 250 $\mu$ m |          |          | 1 mm     |          |          | 1 mm     |          |          |
|              | T           |          |          | NT          |          |          | T        |          |          | NT       |          |          |
| Inoculum M   | 172.306     | 184.8334 | 188.8305 | 139.69      | 136.44   | 129.48   | 127.84   | 144.01   | 142.7    | 62.99    | 61.92    | 62.37    |
| Inoculum H   | 206.78      | 223.5951 | 215.0911 | 158.05      | 183.84   | 180.76   | 159.4374 | 174.7111 | 182.8481 | 88.22303 | 80.59464 | 90.5458  |
| Inoculum S37 | 191.1593    | 208.096  | 172.807  | 66.01834    | 131.8814 | 55.58448 | 153.8788 | 136.5968 | 146.0129 | 87.30989 | 88.13875 | 32.99552 |

**Table S2:** The three-way ANOVA analysis of specific cumulative methane at 30 days of cultivation. P value lower than 0.05 is considered significant.

| Table Analyzed                       |                      | Specific methane 30 days |                 |                                  |
|--------------------------------------|----------------------|--------------------------|-----------------|----------------------------------|
| Three-way ANOVA                      |                      | Ordinary                 |                 |                                  |
| Alpha                                |                      | 0.05                     |                 |                                  |
| Source of Variation                  | % of total variation | P value                  | P value summary | Significant?                     |
| Row factor                           |                      | 11.26 <0.0001 ****       |                 | Yes                              |
| (AB vs CD)                           |                      | 24.9 <0.0001 ****        |                 | Yes                              |
| (AC vs BD)                           |                      | 49.08 <0.0001 ****       |                 | Yes                              |
| Row factor x (AB vs CD)              |                      | 2.195 0.0516 ns          |                 | No                               |
| Row factor x (AC vs BD)              |                      | 1.751 0.0888 ns          |                 | No                               |
| (AB vs CD) x (AC vs BD)              |                      | 0.504 0.2261 ns          |                 | No                               |
| Row factor x (AB vs CD) x (AC vs BD) |                      | 2.476 0.037 *            |                 | Yes                              |
| ANOVA table                          | SS                   | DF                       | MS              | F (DFn, DFd) P value             |
| Row factor                           |                      | 10680                    | 2               | 5340 F (2, 24) = 17.24 P<0.0001  |
| (AB vs CD)                           |                      | 23620                    | 1               | 23620 F (1, 24) = 76.27 P<0.0001 |
| (AC vs BD)                           |                      | 46563                    | 1               | 46563 F (1, 24) = 150.4 P<0.0001 |
| Row factor x (AB vs CD)              |                      | 2082                     | 2               | 1041 F (2, 24) = 3.362 P=0.0516  |
| Row factor x (AC vs BD)              |                      | 1662                     | 2               | 830.8 F (2, 24) = 2.683 P=0.0888 |
| (AB vs CD) x (AC vs BD)              |                      | 478.1                    | 1               | 478.1 F (1, 24) = 1.544 P=0.2261 |
| Row factor x (AB vs CD) x (AC vs BD) |                      | 2349                     | 2               | 1175 F (2, 24) = 3.793 P=0.0370  |
| Residual                             |                      | 7432                     | 24              | 309.7                            |

**Table S3:** Tukey's multiple comparisons test of specific cumulative methane at 30 days of cultivation. P value lower than 0.05 is considered significant.

| Compare each cell mean with every other cell mean |                         |                    |              |         |                  |
|---------------------------------------------------|-------------------------|--------------------|--------------|---------|------------------|
| Number of families                                | 1                       |                    |              |         |                  |
| Number of comparisons per family                  | 66                      |                    |              |         |                  |
| Alpha                                             | 0.05                    |                    |              |         |                  |
| Tukey's multiple comparisons test                 | Mean Diff.              | 95.00% CI of diff. | Significant? | Summary | Adjusted P Value |
| Inoculum M:Group A vs. Inoculum M:Group B         | 46.79 -5.021 to 98.59   |                    | No           | ns      | 0.1034           |
| Inoculum M:Group A vs. Inoculum M:Group C         | 43.81 -8.001 to 95.61   |                    | No           | ns      | 0.1544           |
| Inoculum M:Group A vs. Inoculum M:Group D         | 119.667.76 to 171.4     |                    | Yes          | ****    | <0.0001          |
| Inoculum M:Group A vs. Inoculum H:Group A         | -33.17 -84.97 to 18.64  |                    | No           | ns      | 0.4971           |
| Inoculum M:Group A vs. Inoculum H:Group B         | 7.773 -44.03 to 59.58   |                    | No           | ns      | >0.9999          |
| Inoculum M:Group A vs. Inoculum H:Group C         | 9.658 -42.15 to 61.47   |                    | No           | ns      | 0.9999           |
| Inoculum M:Group A vs. Inoculum H:Group D         | 95.5443.73 to 147.3     |                    | Yes          | ****    | <0.0001          |
| Inoculum M:Group A vs. Inoculum S37:Group A       | -8.697 -60.51 to 43.11  |                    | No           | ns      | >0.9999          |
| Inoculum M:Group A vs. Inoculum S37:Group B       | 97.545.69 to 149.3      |                    | Yes          | ****    | <0.0001          |
| Inoculum M:Group A vs. Inoculum S37:Group C       | 36.49 -15.31 to 88.30   |                    | No           | ns      | 0.3633           |
| Inoculum M:Group A vs. Inoculum S37:Group D       | 112.560.70 to 164.3     |                    | Yes          | ****    | <0.0001          |
| Inoculum M:Group B vs. Inoculum M:Group C         | -2.98 -54.79 to 48.83   |                    | No           | ns      | >0.9999          |
| Inoculum M:Group B vs. Inoculum M:Group D         | 72.7820.97 to 124.6     |                    | Yes          | **      | 0.0017           |
| Inoculum M:Group B vs. Inoculum H:Group A         | -79.95 -131.8 to -28.14 |                    | Yes          | ***     | 0.0005           |
| Inoculum M:Group B vs. Inoculum H:Group B         | -39.01 -90.82 to 12.79  |                    | No           | ns      | 0.277            |
| Inoculum M:Group B vs. Inoculum H:Group C         | -37.13 -88.94 to 14.68  |                    | No           | ns      | 0.3402           |
| Inoculum M:Group B vs. Inoculum H:Group D         | 48.75 -3.059 to 100.6   |                    | No           | ns      | 0.0783           |
| Inoculum M:Group B vs. Inoculum S37:Group A       | -55.48 -107.3 to -3.676 |                    | Yes          | *       | 0.0285           |
| Inoculum M:Group B vs. Inoculum S37:Group B       | 50.71 -1.099 to 102.5   |                    | No           | ns      | 0.0589           |
| Inoculum M:Group B vs. Inoculum S37:Group C       | -10.29 -62.10 to 41.52  |                    | No           | ns      | 0.9998           |
| Inoculum M:Group B vs. Inoculum S37:Group D       | 65.7213.91 to 117.5     |                    | Yes          | **      | 0.0055           |
| Inoculum M:Group C vs. Inoculum M:Group D         | 75.7623.95 to 127.6     |                    | Yes          | **      | 0.001            |
| Inoculum M:Group C vs. Inoculum H:Group A         | -76.97 -128.8 to -25.16 |                    | Yes          | ***     | 0.0008           |
| Inoculum M:Group C vs. Inoculum H:Group B         | -36.03 -87.84 to 15.77  |                    | No           | ns      | 0.3807           |
| Inoculum M:Group C vs. Inoculum H:Group C         | -34.15 -85.96 to 17.66  |                    | No           | ns      | 0.4557           |
| Inoculum M:Group C vs. Inoculum H:Group D         | 51.73 -0.07902 to 103.5 |                    | No           | ns      | 0.0506           |
| Inoculum M:Group C vs. Inoculum S37:Group A       | -52.5 -104.3 to -0.6962 |                    | Yes          | *       | 0.045            |
| Inoculum M:Group C vs. Inoculum S37:Group B       | 53.691.881 to 105.5     |                    | Yes          | *       | 0.0376           |
| Inoculum M:Group C vs. Inoculum S37:Group C       | -7.313 -59.12 to 44.50  |                    | No           | ns      | >0.9999          |
| Inoculum M:Group C vs. Inoculum S37:Group D       | 68.716.89 to 120.5      |                    | Yes          | **      | 0.0033           |
| Inoculum M:Group D vs. Inoculum H:Group A         | -152.7 -204.5 to -100.9 |                    | Yes          | ****    | <0.0001          |
| Inoculum M:Group D vs. Inoculum H:Group B         | -111.8 -163.6 to -59.98 |                    | Yes          | ****    | <0.0001          |
| Inoculum M:Group D vs. Inoculum H:Group C         | -109.9 -161.7 to -58.10 |                    | Yes          | ****    | <0.0001          |
| Inoculum M:Group D vs. Inoculum H:Group D         | -24.03 -75.84 to 27.78  |                    | No           | ns      | 0.8637           |
| Inoculum M:Group D vs. Inoculum S37:Group A       | -128.3 -180.1 to -76.45 |                    | Yes          | ****    | <0.0001          |
| Inoculum M:Group D vs. Inoculum S37:Group B       | -22.07 -73.88 to 29.74  |                    | No           | ns      | 0.9153           |
| Inoculum M:Group D vs. Inoculum S37:Group C       | -83.07 -134.9 to -31.26 |                    | Yes          | ***     | 0.0003           |
| Inoculum M:Group D vs. Inoculum S37:Group D       | -7.055 -58.86 to 44.75  |                    | No           | ns      | >0.9999          |
| Inoculum H:Group A vs. Inoculum H:Group B         | 40.94 -10.87 to 92.75   |                    | No           | ns      | 0.2212           |
| Inoculum H:Group A vs. Inoculum H:Group C         | 42.82 -8.985 to 94.63   |                    | No           | ns      | 0.1752           |
| Inoculum H:Group A vs. Inoculum H:Group D         | 128.776.89 to 180.5     |                    | Yes          | ****    | <0.0001          |
| Inoculum H:Group A vs. Inoculum S37:Group A       | 24.47 -27.34 to 76.28   |                    | No           | ns      | 0.8502           |
| Inoculum H:Group A vs. Inoculum S37:Group B       | 130.778.85 to 182.5     |                    | Yes          | ****    | <0.0001          |
| Inoculum H:Group A vs. Inoculum S37:Group C       | 69.6617.85 to 121.5     |                    | Yes          | **      | 0.0028           |
| Inoculum H:Group A vs. Inoculum S37:Group D       | 145.793.87 to 197.5     |                    | Yes          | ****    | <0.0001          |
| Inoculum H:Group B vs. Inoculum H:Group C         | 1.884 -49.92 to 53.69   |                    | No           | ns      | >0.9999          |
| Inoculum H:Group B vs. Inoculum H:Group D         | 87.7635.95 to 139.6     |                    | Yes          | ***     | 0.0001           |
| Inoculum H:Group B vs. Inoculum S37:Group A       | -16.47 -68.28 to 35.34  |                    | No           | ns      | 0.9886           |
| Inoculum H:Group B vs. Inoculum S37:Group B       | 89.7237.91 to 141.5     |                    | Yes          | ****    | <0.0001          |
| Inoculum H:Group B vs. Inoculum S37:Group C       | 28.72 -23.09 to 80.53   |                    | No           | ns      | 0.69             |
| Inoculum H:Group B vs. Inoculum S37:Group D       | 104.752.93 to 156.5     |                    | Yes          | ****    | <0.0001          |
| Inoculum H:Group C vs. Inoculum H:Group D         | 85.8834.07 to 137.7     |                    | Yes          | ***     | 0.0002           |
| Inoculum H:Group C vs. Inoculum S37:Group A       | -18.36 -70.16 to 33.45  |                    | No           | ns      | 0.9745           |
| Inoculum H:Group C vs. Inoculum S37:Group B       | 87.8436.03 to 139.6     |                    | Yes          | ***     | 0.0001           |
| Inoculum H:Group C vs. Inoculum S37:Group C       | 26.84 -24.97 to 78.64   |                    | No           | ns      | 0.7666           |
| Inoculum H:Group C vs. Inoculum S37:Group D       | 102.951.04 to 154.7     |                    | Yes          | ****    | <0.0001          |
| Inoculum H:Group D vs. Inoculum S37:Group A       | -104.2 -156.0 to -52.43 |                    | Yes          | ****    | <0.0001          |
| Inoculum H:Group D vs. Inoculum S37:Group B       | 1.96 -49.85 to 53.77    |                    | No           | ns      | >0.9999          |
| Inoculum H:Group D vs. Inoculum S37:Group C       | -59.04 -110.8 to -7.234 |                    | Yes          | *       | 0.0162           |
| Inoculum H:Group D vs. Inoculum S37:Group D       | 16.97 -34.83 to 68.78   |                    | No           | ns      | 0.9856           |
| Inoculum S37:Group A vs. Inoculum S37:Group B     | 106.254.38 to 158.0     |                    | Yes          | ****    | <0.0001          |
| Inoculum S37:Group A vs. Inoculum S37:Group C     | 45.19 -6.617 to 97.00   |                    | No           | ns      | 0.1285           |
| Inoculum S37:Group A vs. Inoculum S37:Group D     | 121.269.40 to 173.0     |                    | Yes          | ****    | <0.0001          |
| Inoculum S37:Group B vs. Inoculum S37:Group C     | -61 -112.8 to -9.194    |                    | Yes          | *       | 0.0118           |
| Inoculum S37:Group B vs. Inoculum S37:Group D     | 15.01 -36.79 to 66.82   |                    | No           | ns      | 0.9945           |
| Inoculum S37:Group C vs. Inoculum S37:Group D     | 76.0124.21 to 127.8     |                    | Yes          | ***     | 0.001            |
